# Supplementary material
Source: publisher figshare collection journal article supplement (https://acs.figshare.com/ndownloader/files/4221379)

## Supporting Online Material for

### Neutron Pair Distribution Function Study of 2-line Ferrihydrite

Richard Harrington<sup>1,2</sup>, Douglas B. Hausner<sup>3,4</sup>, Wenqian Xu<sup>1</sup>, Narayan Bhandari<sup>3</sup>, F. Marc Michel<sup>5,6</sup>, Gordon E. Brown Jr.<sup>5,6</sup>, Daniel R. Strongin<sup>3</sup> and John B. Parise<sup>1,2</sup>

<sup>1</sup>Department of Geosciences, Stony Brook University, Stony Brook, NY 11794, USA

<sup>2</sup>Department of Chemistry, Stony Brook University, Stony Brook, NY 11794, USA

<sup>3</sup>Department of Chemistry, Temple University, Philadelphia, PA 19122, USA

<sup>4</sup>Department of Chemistry, Rutgers - Camden, Camden, NJ 08102, USA

<sup>5</sup>Department of Geological & Environmental Sciences, Stanford University, Stanford, CA 94305, USA

<sup>6</sup>Stanford Synchrotron Radiation Lightsource, SLAC National Accelerator Laboratory, 2575 Sand Hill Road, Menlo Park, CA 94025, USA

Contact: Richard.Harrington81@gmail.com

**Figure S1.** Thermogravimetric analysis (TGA) of 2-line ferrihydrite heated under vacuum.

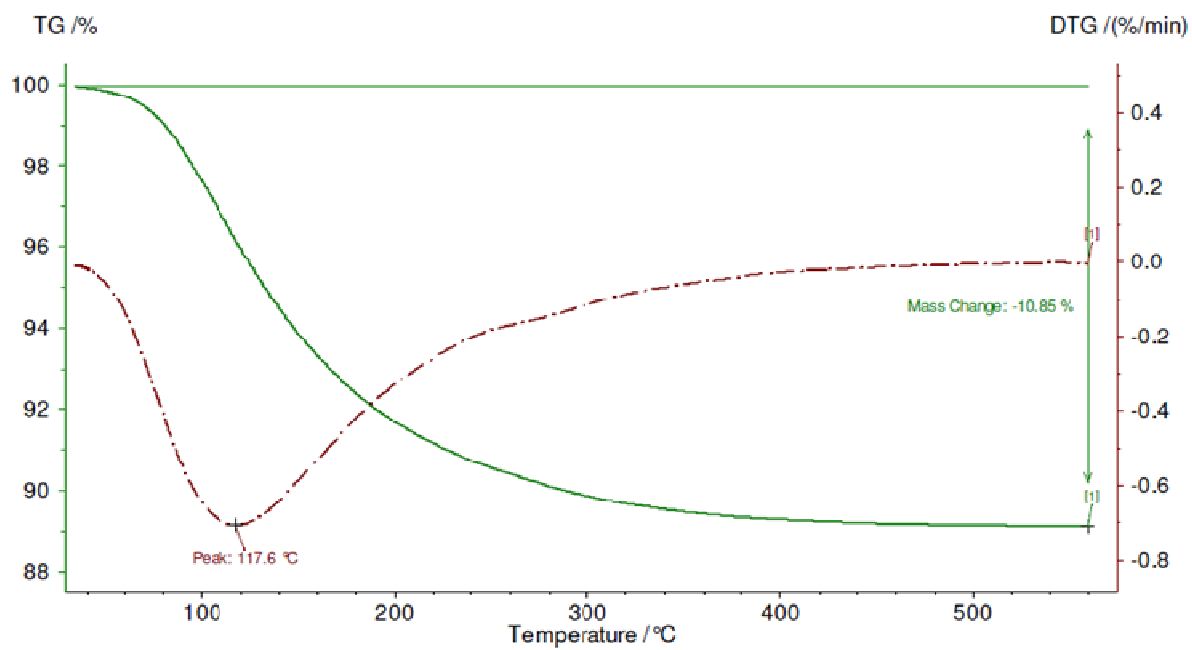

### Fits to other iron oxides and oxyhydroxides.

**Figure S2.** Fit of the hematite structure to the neutron PDF data. The blue circles are the experimental data, the red line the calculated curve and the green curve the difference between them.  $R_w = 79\%$ .

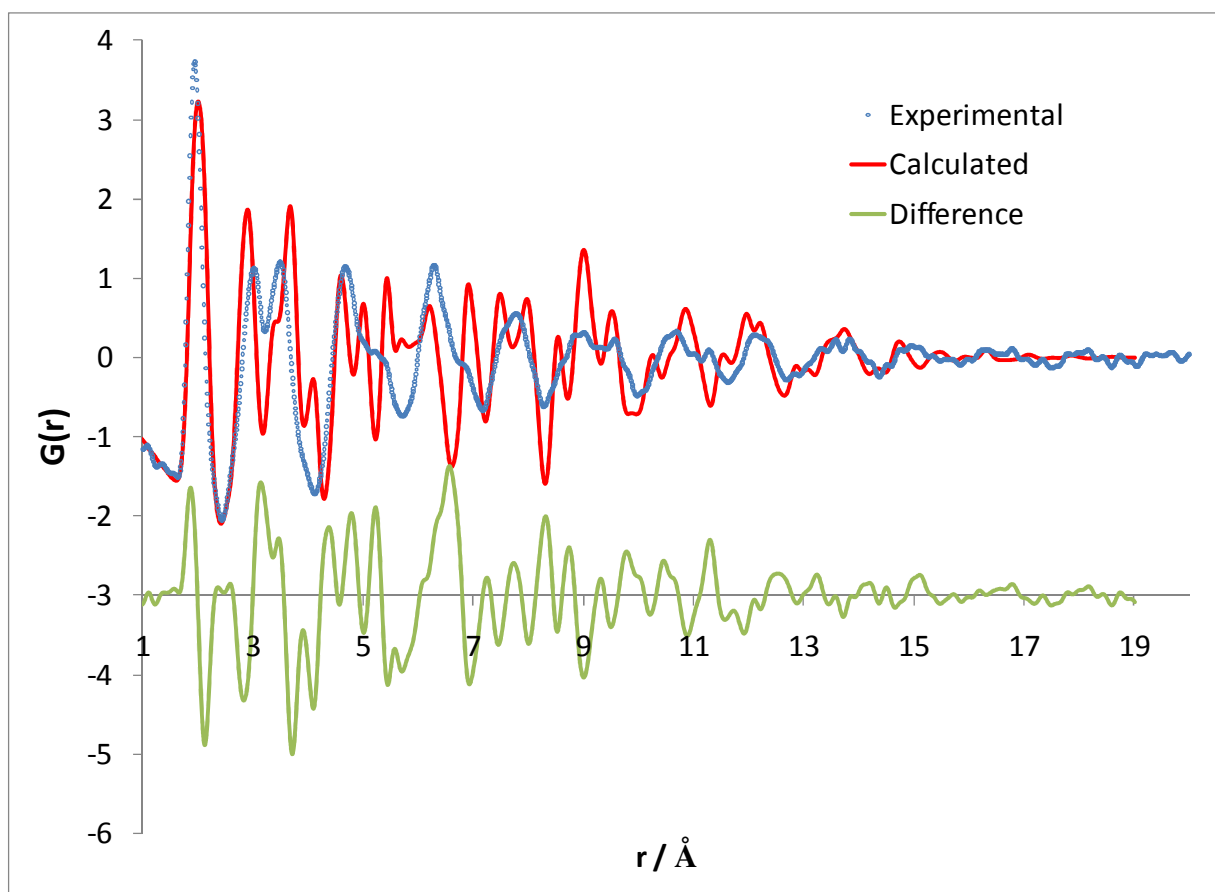

**Figure S3, Magnetite,  $\text{Fe}_3\text{O}_4$**

Refined the scale factor and Sratio. The positions of the peaks are reasonable, but the intensities are mismatched, especially at low  $r$  where it would be expected the fit would be the best. The 3<sup>rd</sup> peak is large as it contains contributions from Fe-O and Fe-Fe correlations.

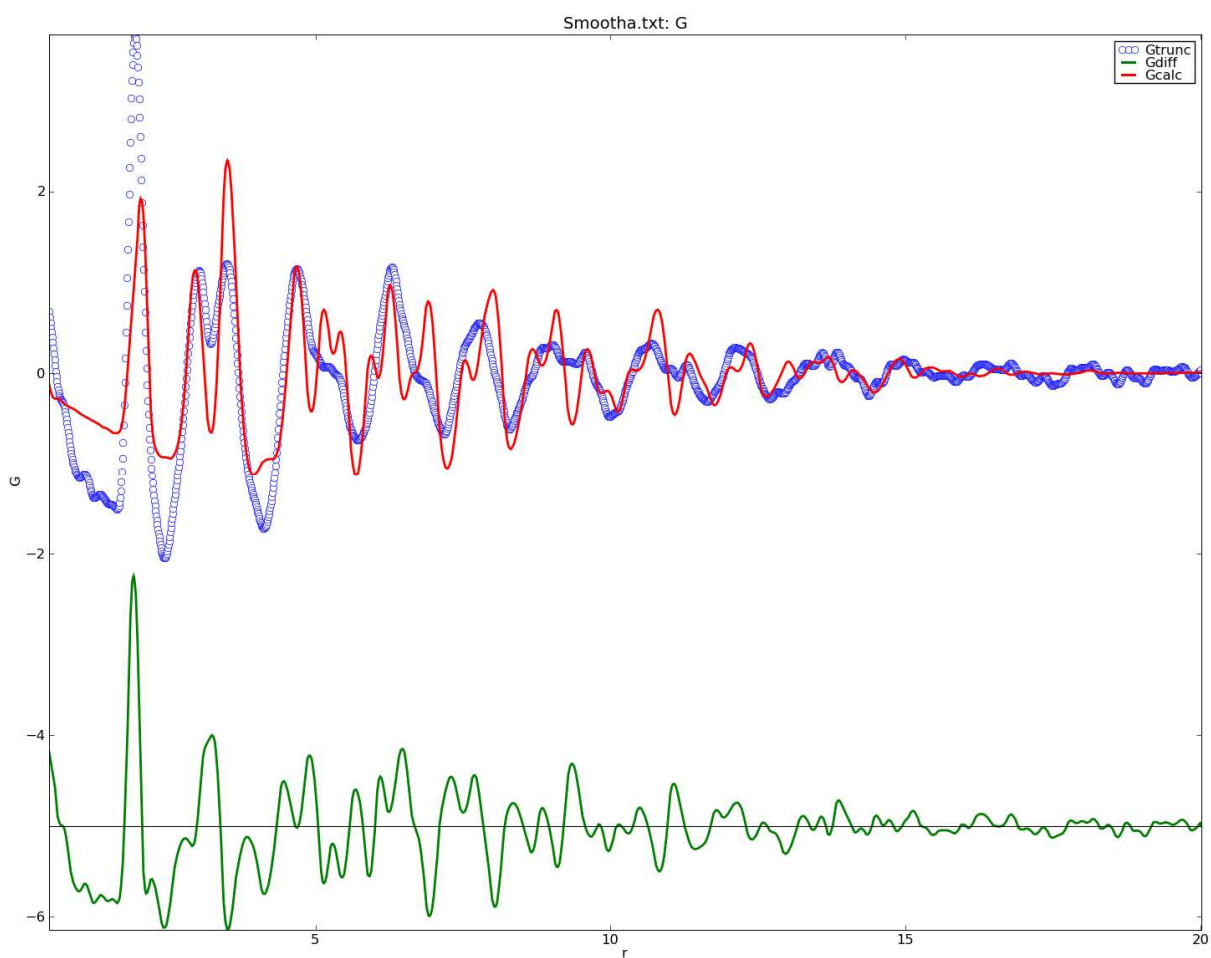

**Figure S4, Maghemite,  $\text{Fe}_{2.677}\text{O}_4$**

Refined scale, ratio,  $U_{\text{Fe}}$  and  $U_{\text{O}}$  (as the CIF gives no  $U_{\text{iso}}$  values). The fit is reasonably good. The fit to the first peak is poor, it appears to be 2 separate peaks.

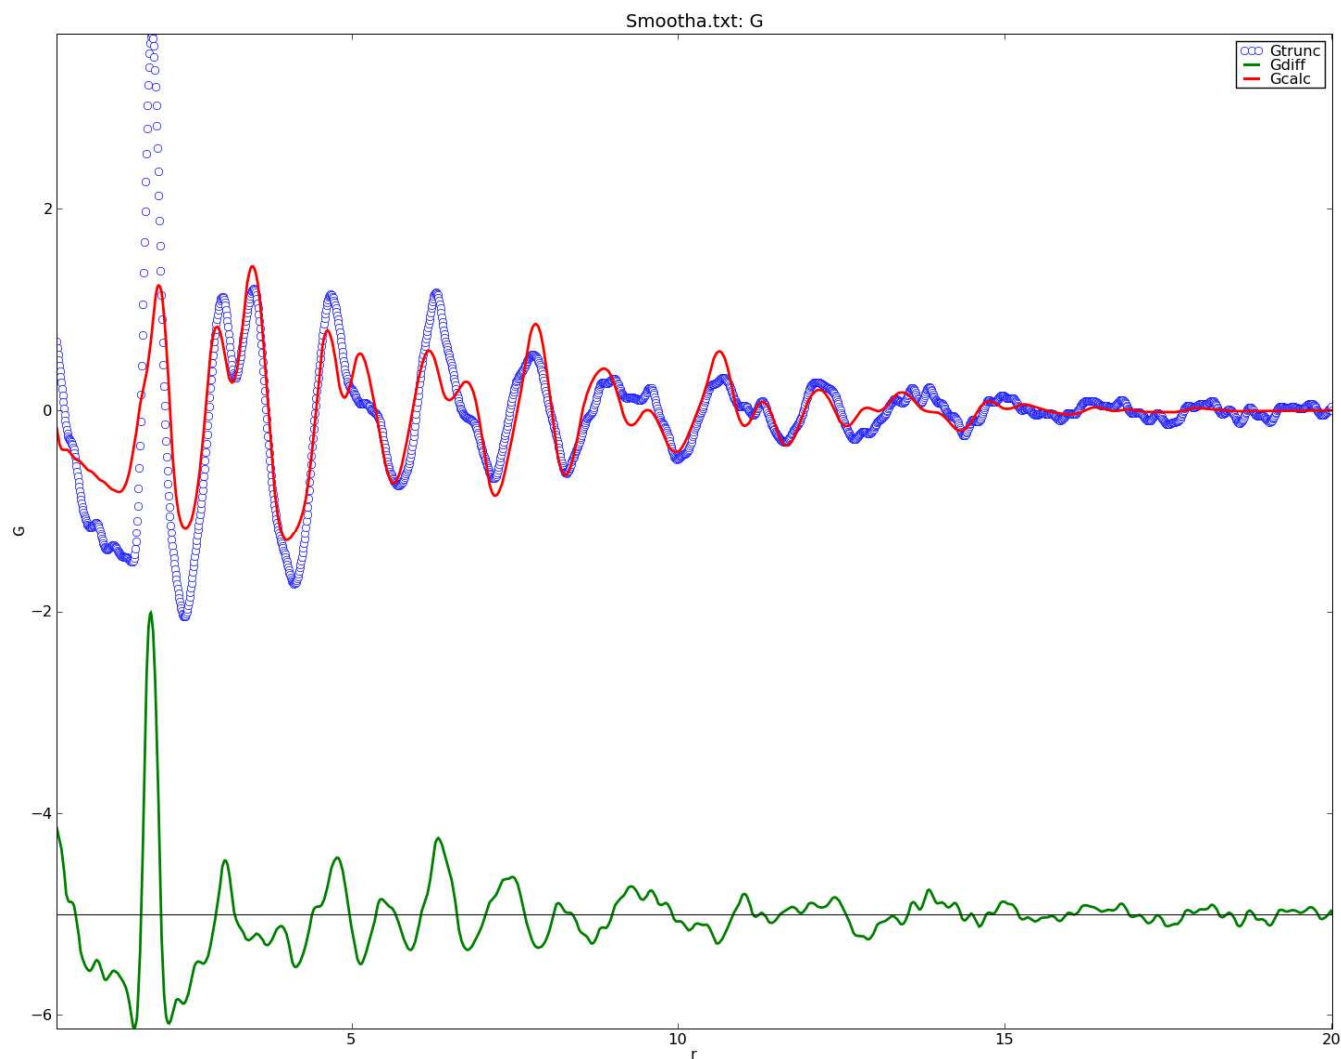

**Figure S5, Lepidocrocite FeOOH,**

Refined scale, sratio and tried to refine  $U_{\text{Fe}}$  and  $U_{\text{O}}$ , as they were 0 in the CIF. These did not change from the given values (0.01 & 0.02 respectively). The fit is terrible, as shown below.

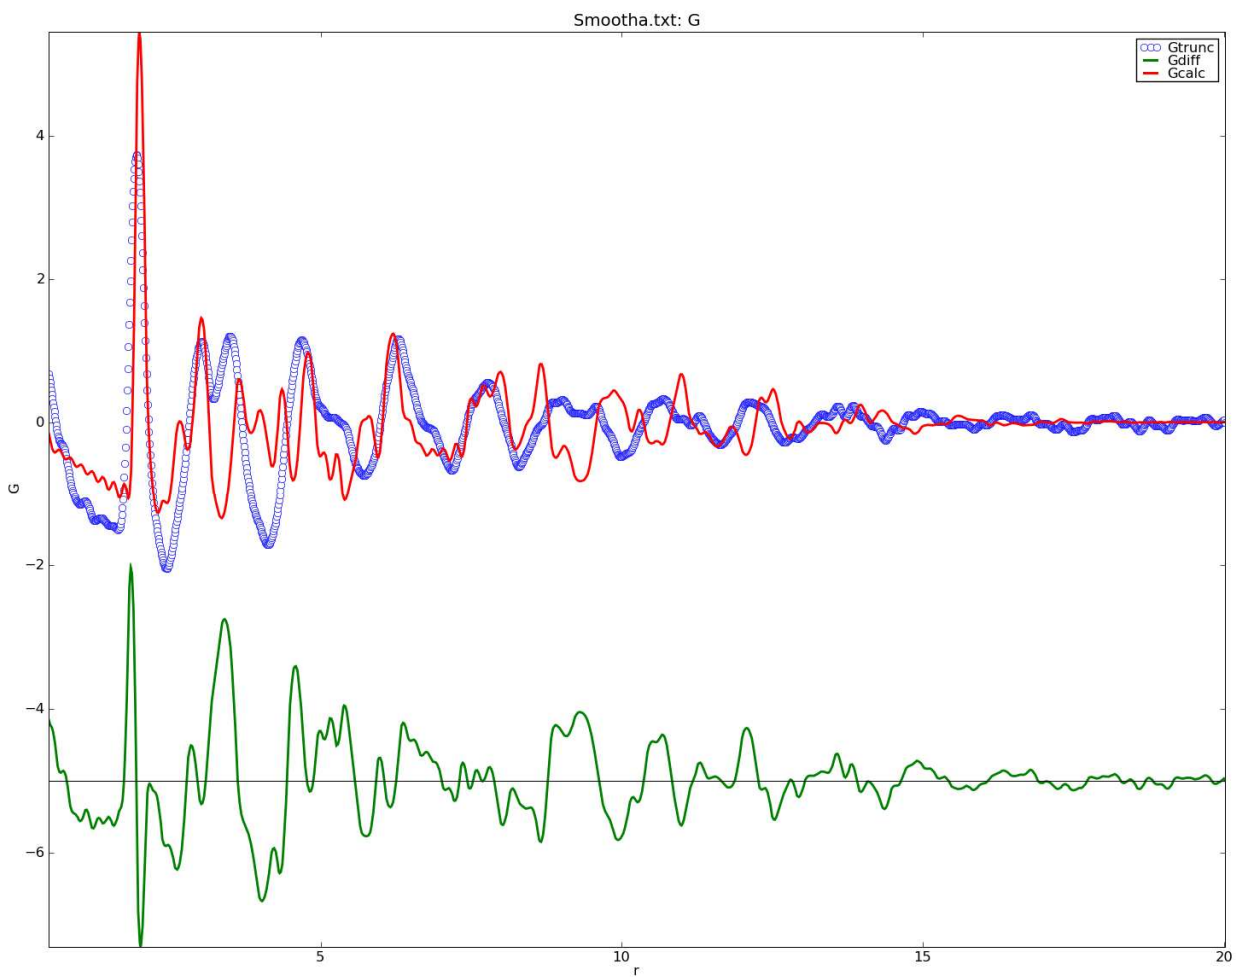

**Figure S6, Goethite,  $\alpha$ -FeOOH**

Refined scale and sratio. With the exception of the first peak, the fit is terrible.

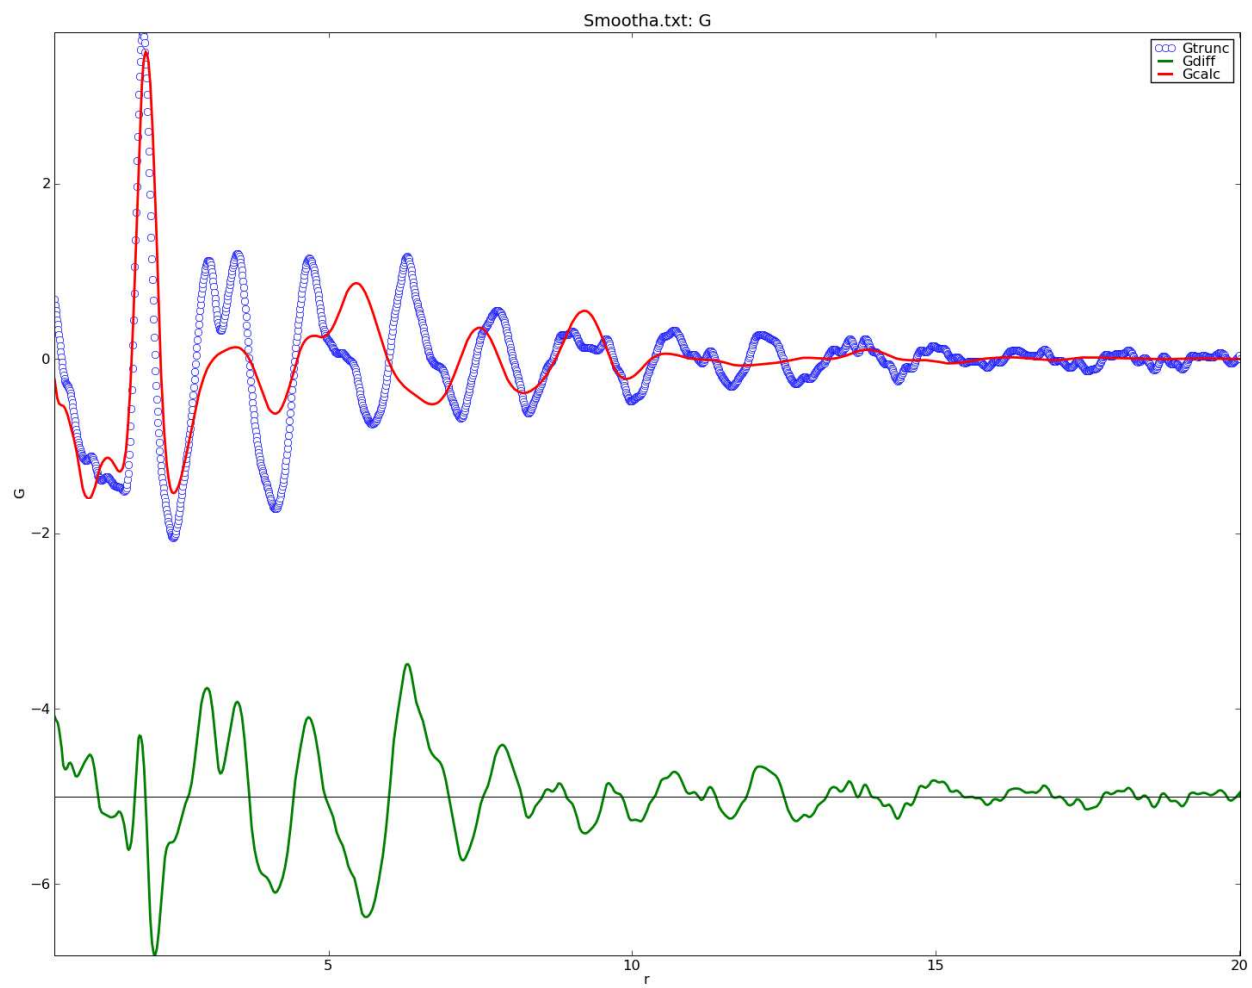

**Figure S7.** Fit of the dominant defect-free phase from Drits et al. to the neutron diffraction data.

The blue circles are the experimental data, the red line the calculated curve and the green curve the difference between them. The fit returned an  $R_w$  value of 50%.

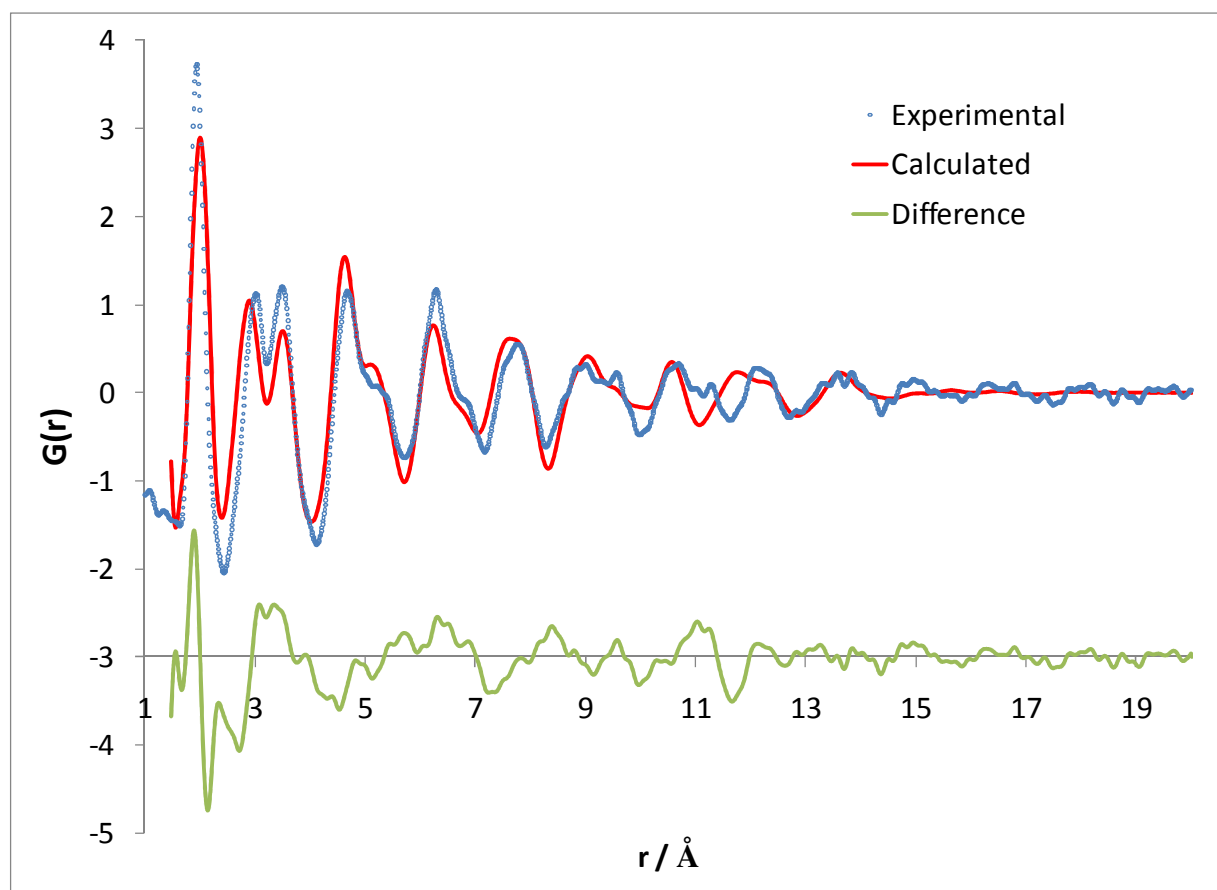



**Figure S8.** Fit of the defective phase from Drits et al. to the neutron diffraction data. The blue circles are the experimental data, the red line the calculated curve and the green curve the difference between them.

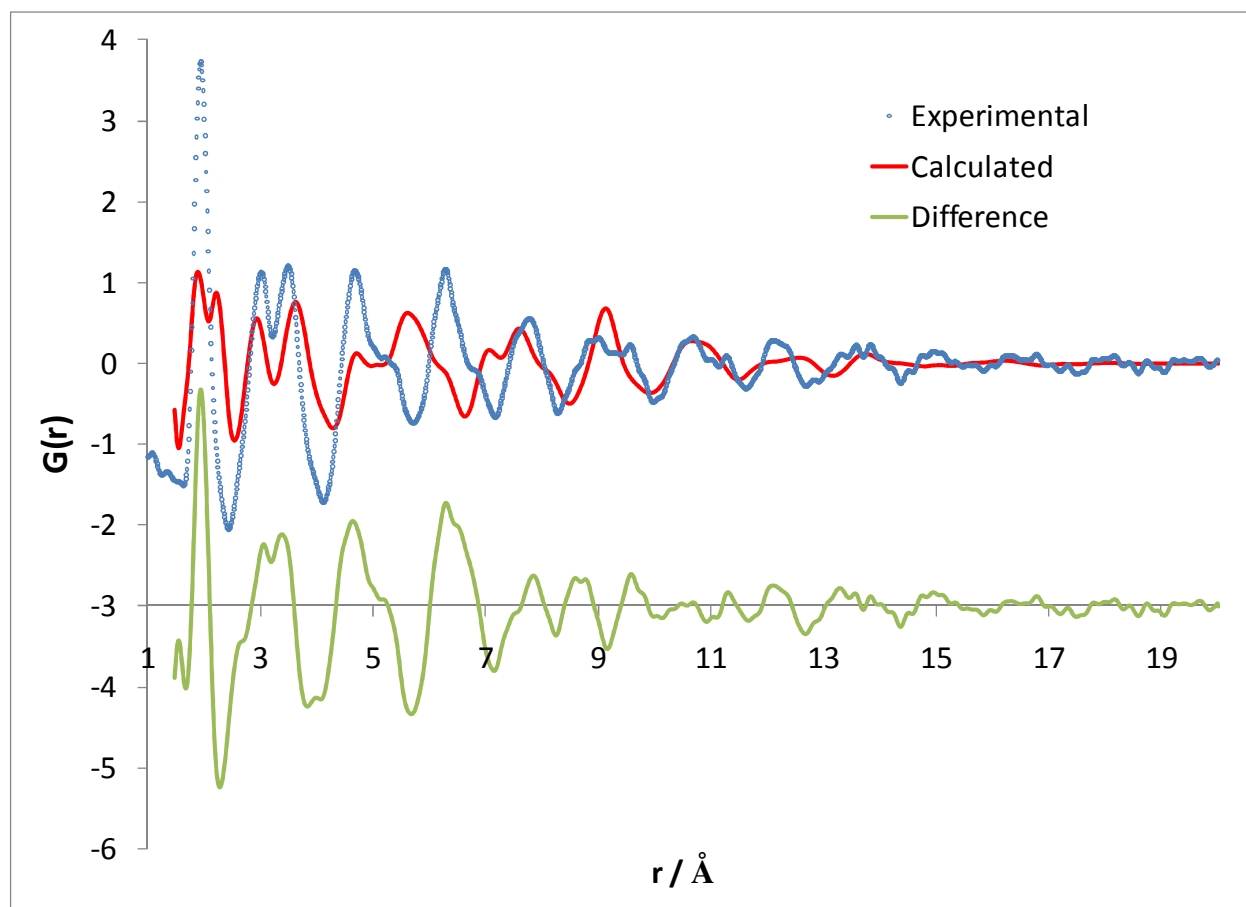

Supplement: Supplementary file 1 [file 4221379]
